# Supplementary material for: Therapeutic Peptide RF16 Derived from CXCL8 Inhibits MDA-MB-231 Cell Invasion and Metastasis
Source: MDPI journal article supplement (doi:10.3390/ijms241814029), 2023-09-13
Supplement: s1 [file s1]

A

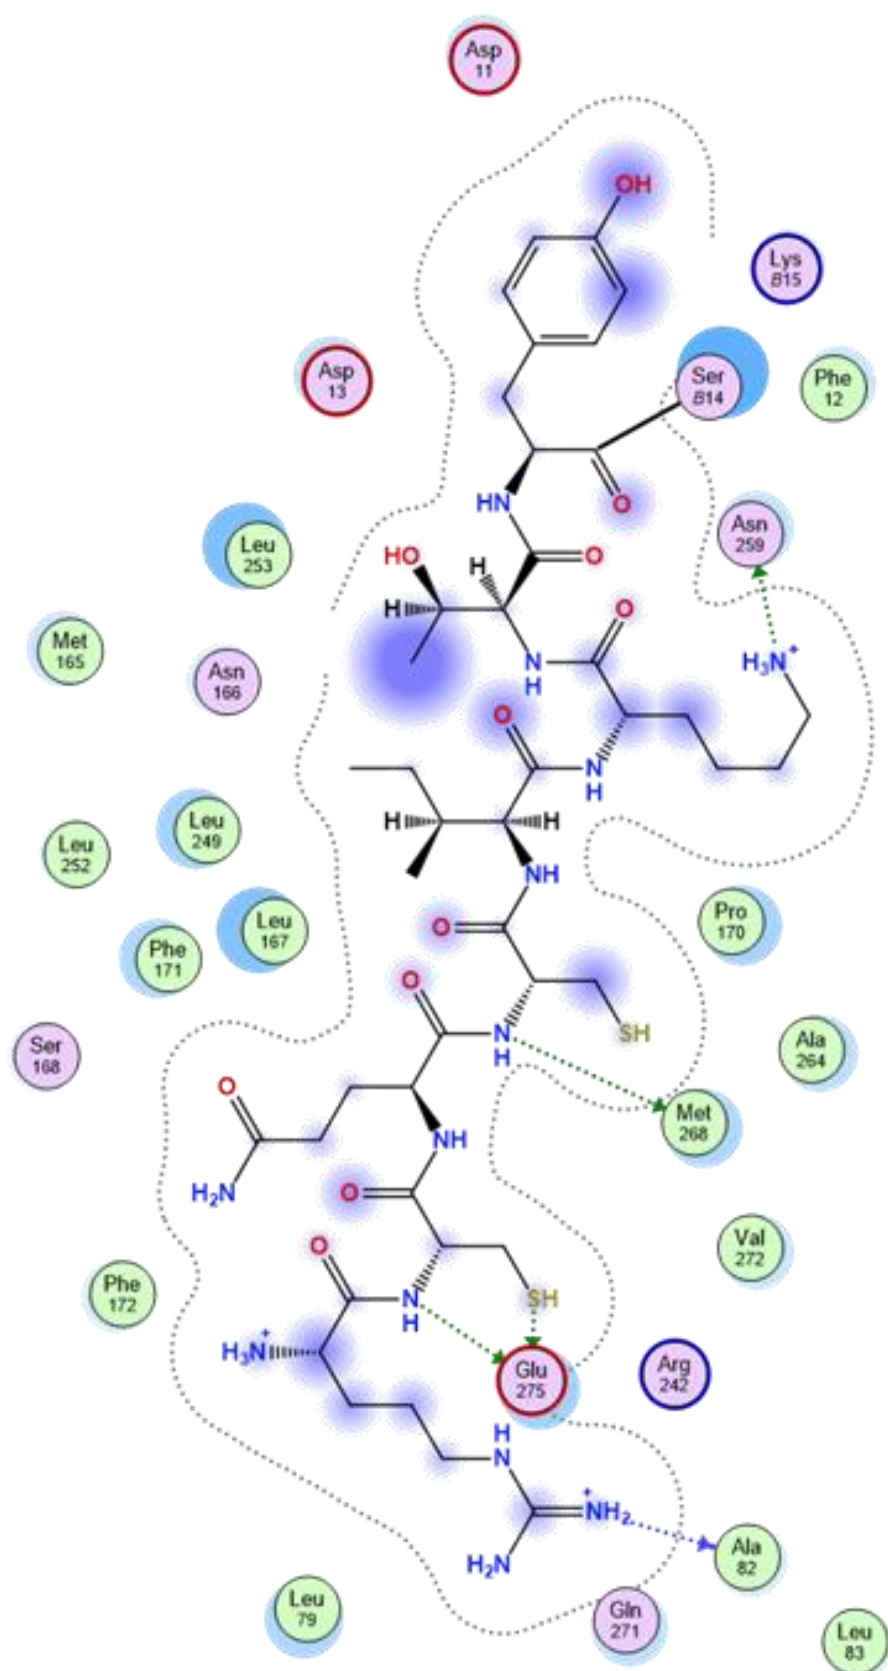

B

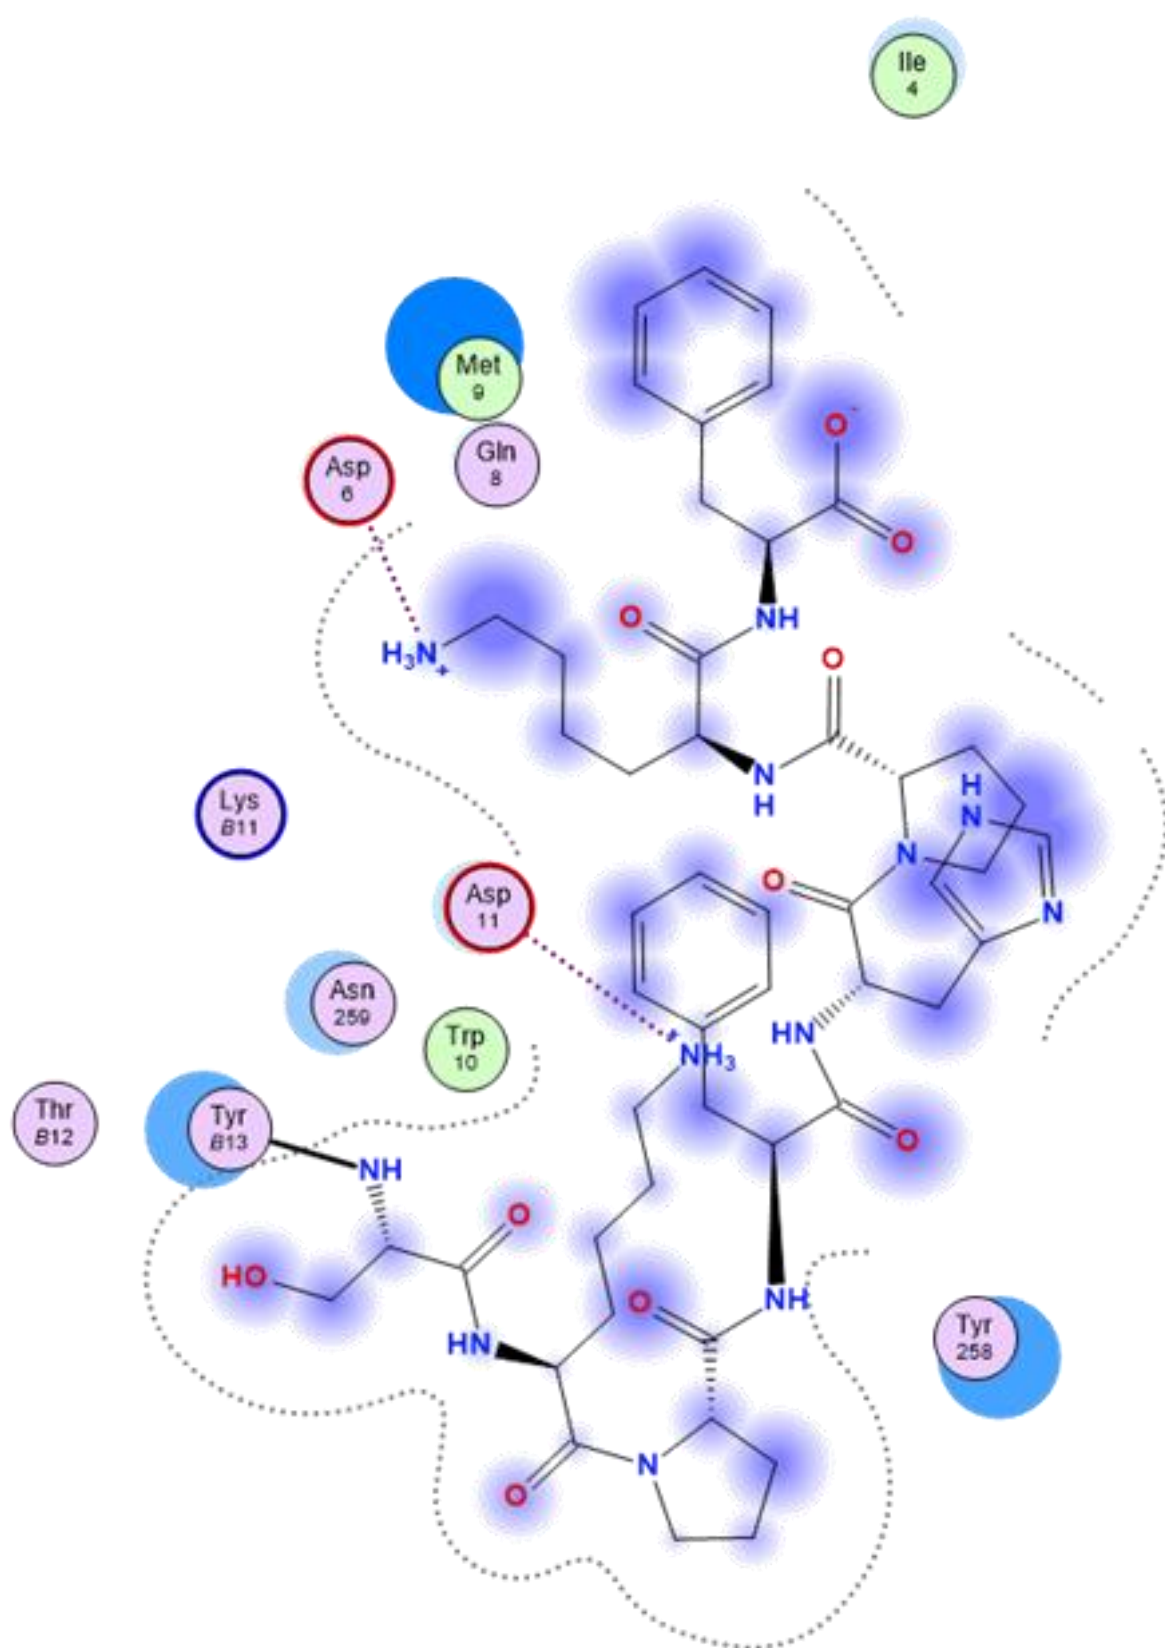

C

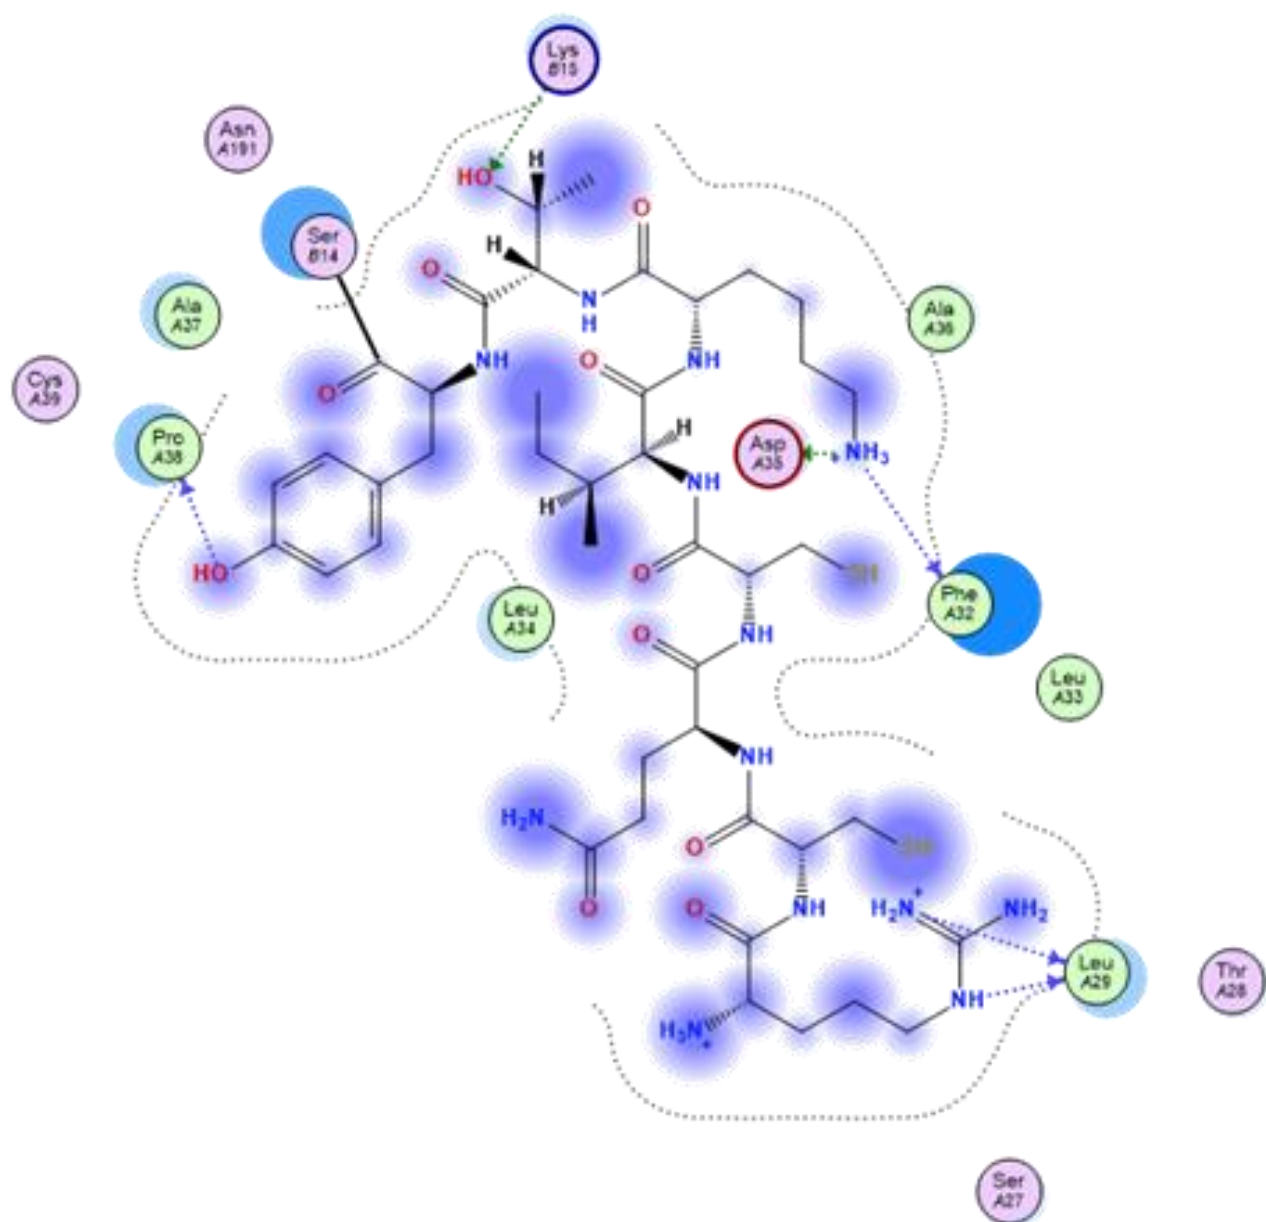

D

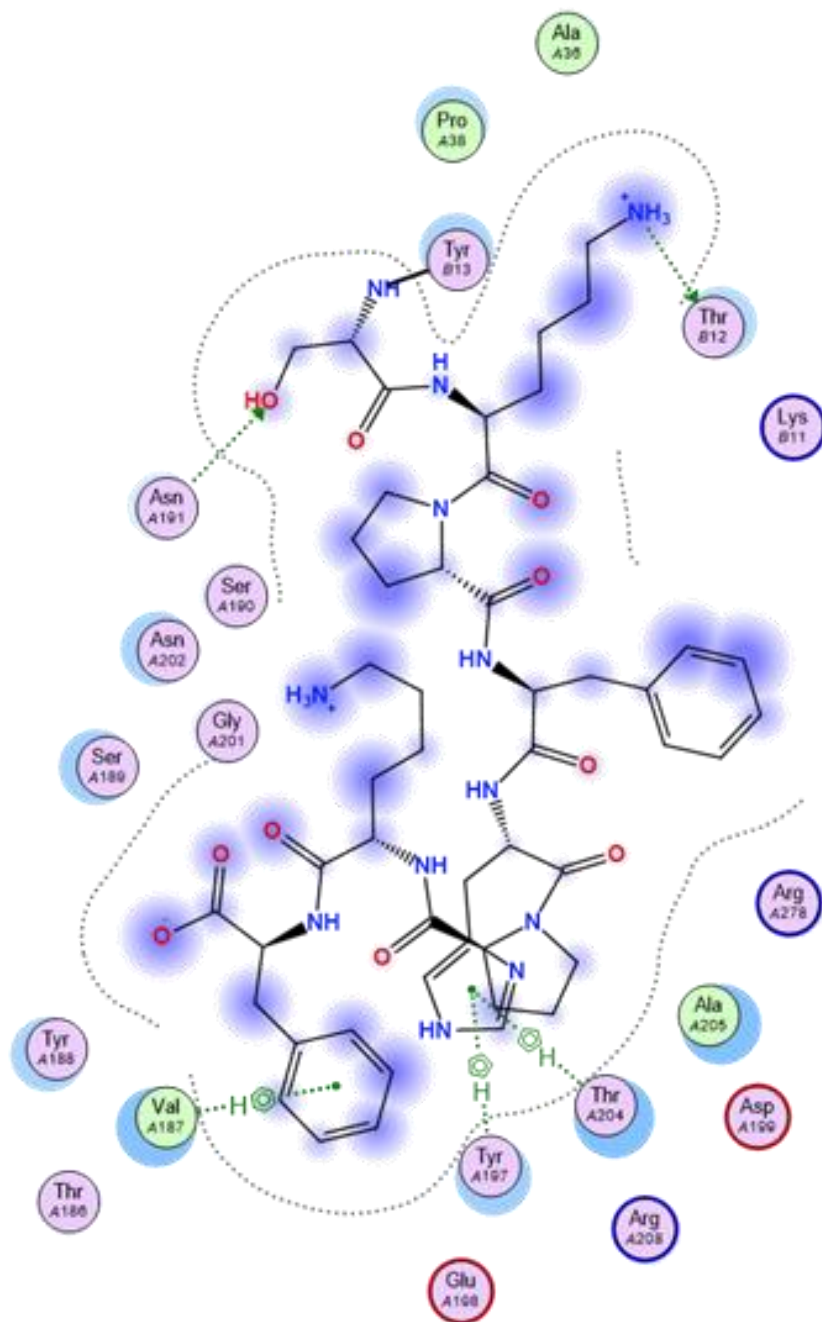

**Supplementary Figure S1.** 2D position analysis of Figure 1. The RF-16 peptide sequence is RCQCIKTYSKPFHPKF. Here it shows is the map of ligand to receptor interaction. the result is divided into 4 parts:

- A. N-terminal (bottom; R to Y) binding to CXCR1
- B. C-terminal (top; S to F) binding to CXCR1
- C. N-terminal (bottom; R to Y) binding to CXCR2
- D. C-terminal (top; S to F) binding to CXCR2
